# Supplementary material for: An intrinsic circadian clock of the pancreas is required for normal insulin release and glucose homeostasis in mice
Source: Springer Nature journal article supplement (doi:10.1007/s00125-010-1920-8), 2010-10-02
Supplement: MOESM2 [file 8089536]

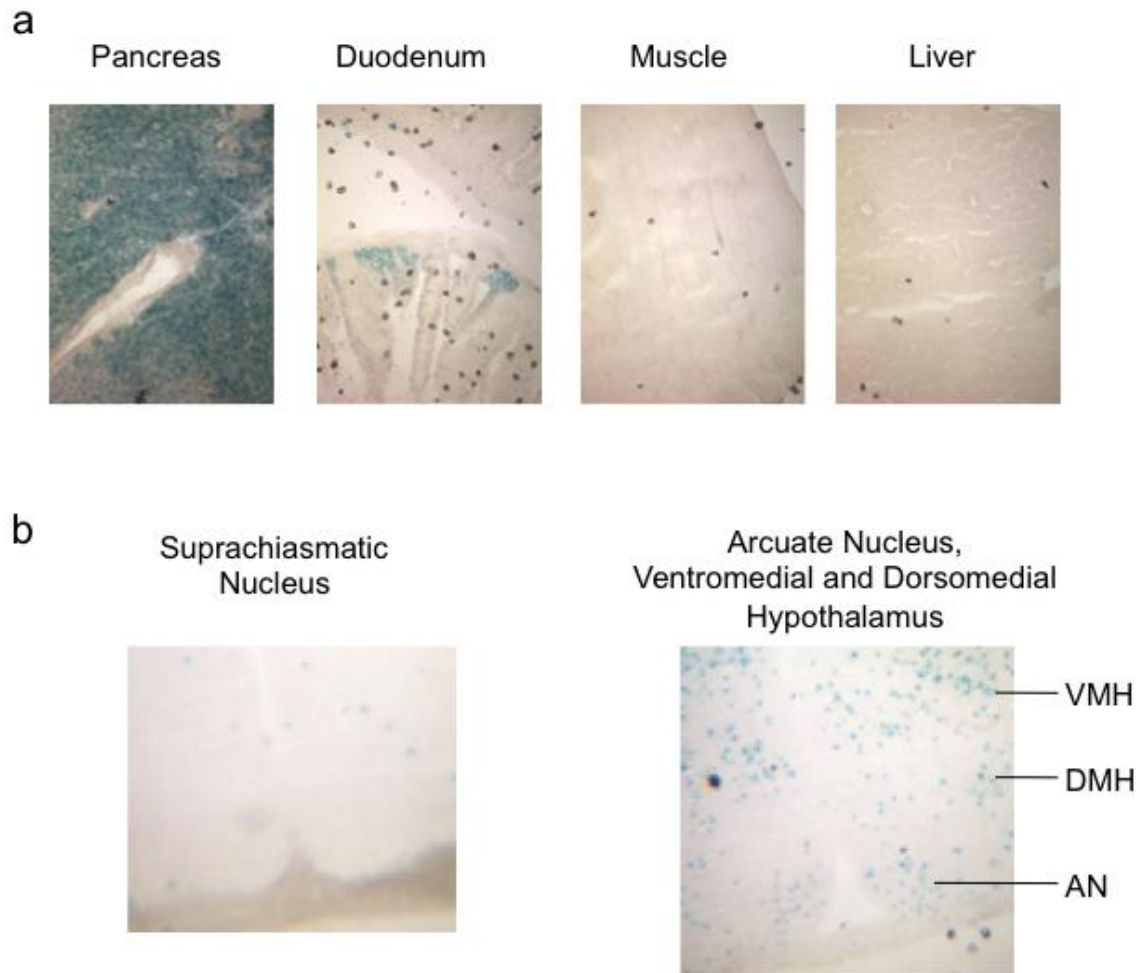

Supp. Fig. 1

**Electronic supplementary material**

**ESM Fig. 1** Sites of Cre recombinase activity from the *Pdx1-Cre* transgene in *R26r* indicator mice. **a** Peripheral tissue beta galactosidase histochemistry of the indicated tissue sections confirming the previously reported pattern of *Pdx1-Cre* activity. **b** Beta galactosidase histochemistry of indicated coronal brain sections. No activity was detected in the SCN or in the brain generally, but scattered activity was detected in the arcuate nucleus (AN), dorsomedial hypothalamus (DMH) and ventomedial hypothalamus (VMH) as indicated. Images are representative of those derived from three mice
