# Supplementary material for: An intrinsic circadian clock of the pancreas is required for normal insulin release and glucose homeostasis in mice
Source: Springer Nature journal article supplement (doi:10.1007/s00125-010-1920-8), 2010-10-02
Supplement: MOESM3 [file 8089536]

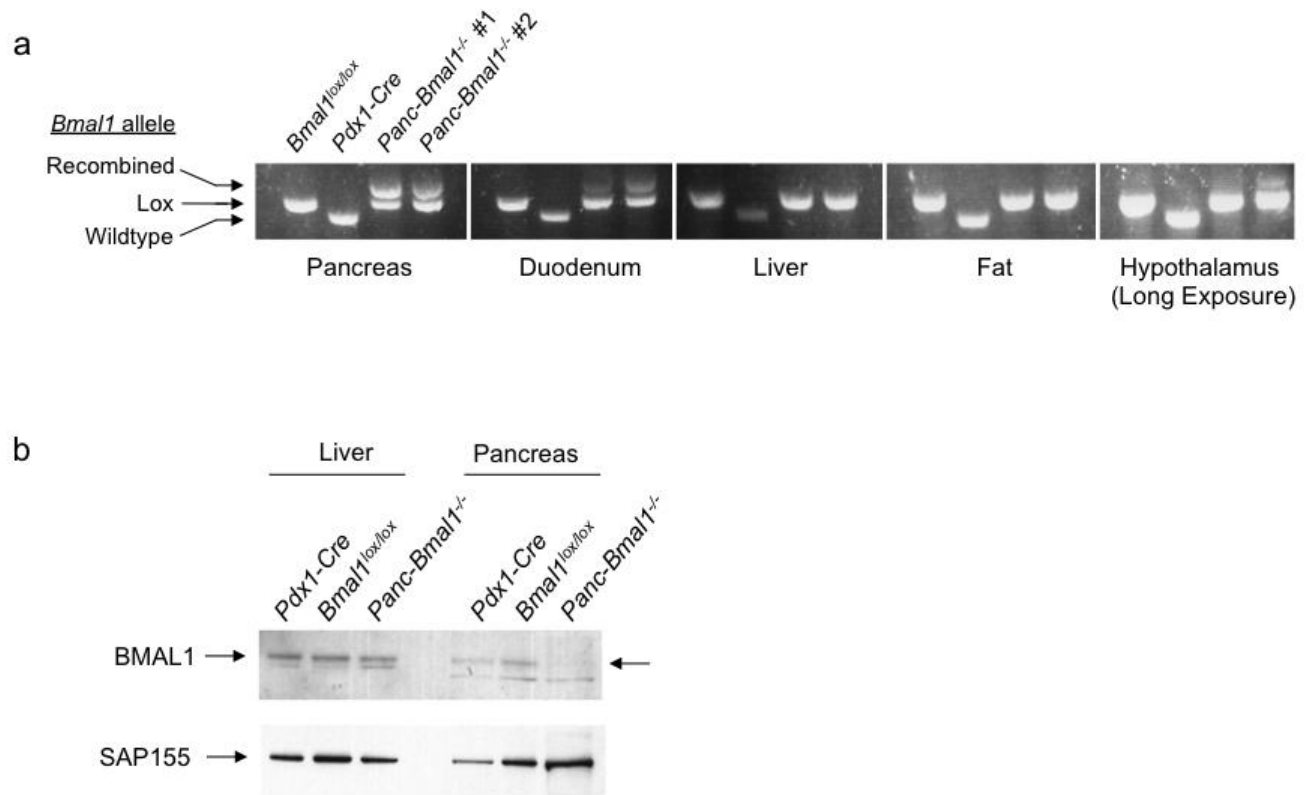

Supp. Fig. 2

**Electronic supplementary material**

**ESM Fig. 2** Analysis of the *Bmal1* gene and BMAL1 protein in *Panc-Bmal1*<sup>-/-</sup> mice. **a** PCR analysis of genomic DNA from the indicated tissues from mice of the indicated genotypes (lane designations same for each tissue). **b** Western blot analysis of BMAL1 protein from nuclear extracts of the indicated tissues from mice of the indicated genotypes. Nuclear protein SAP155 served as a loading control. Trace BMAL1 in pancreas sample is likely to have derived from vascular cells within the pancreas, in which recombination by *Pdx1-Cre* should not occur
