# Supplementary material for: An intrinsic circadian clock of the pancreas is required for normal insulin release and glucose homeostasis in mice
Source: Springer Nature journal article supplement (doi:10.1007/s00125-010-1920-8), 2010-10-02
Supplement: MOESM4 [file 8089536]

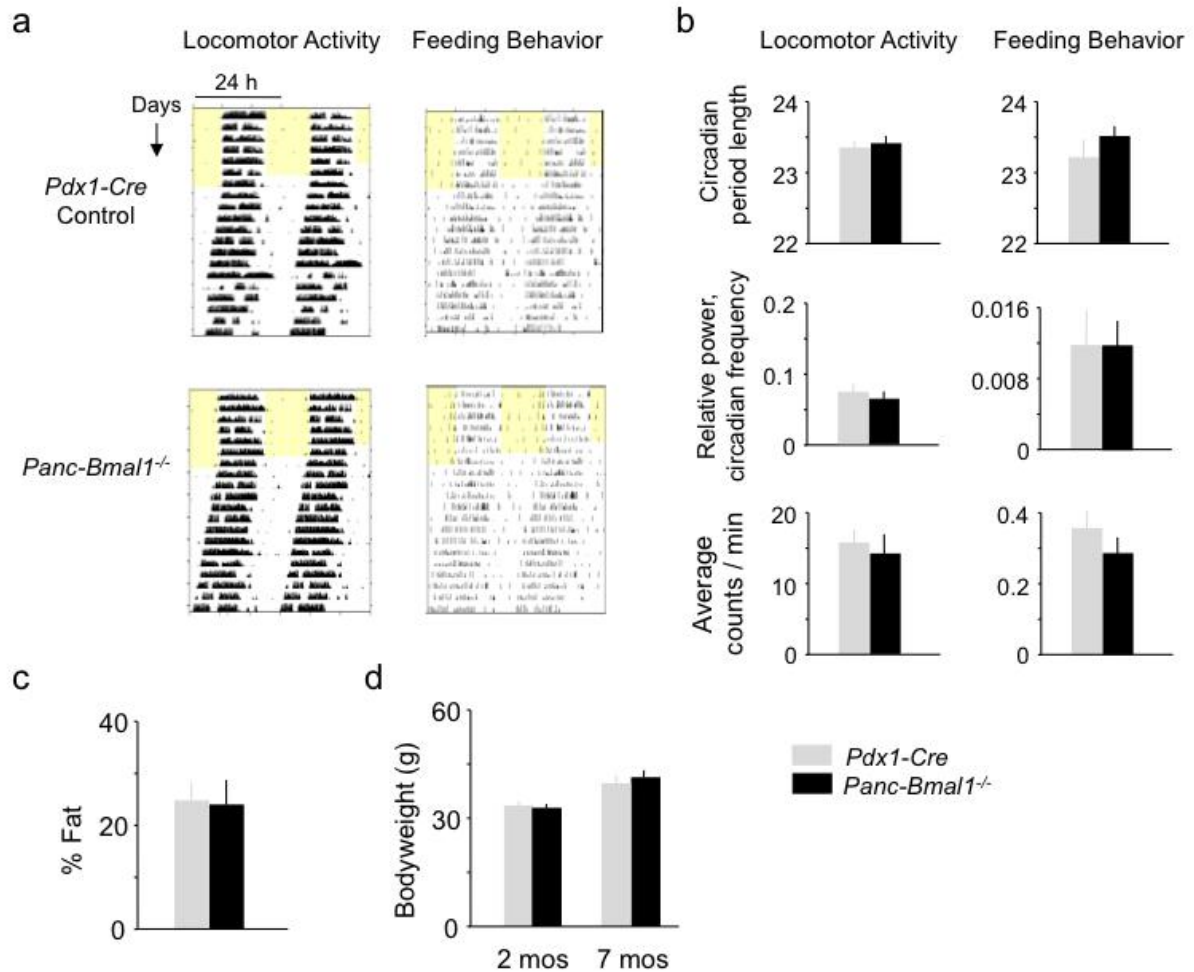

Supp. Fig. 3

**Electronic supplementary material**

**ESM Fig. 3** *Panc-Bmal1<sup>-/-</sup>* mice and littermate controls were indistinguishable in behaviour, adiposity and bodyweight. **a** Representative double-plotted actograms for locomotor activity (running wheel behaviour) and feeding behaviour (food approach beam-breaks) of mice of the indicated genotypes. Horizontal axes represent time (2 × 24 h), successive lines (top to bottom) on vertical axes represent successive days. Tick marks represent running wheel revolutions (>0 per 6-min time bin, left) or food-approach beam-breaks. **b** Quantification of population data for the indicated variables for locomotor activity or feeding behaviour as indicated. Black bars, *Panc-Bmal1<sup>-/-</sup>* mice (locomotor activity  $n=25$ , feeding behaviour  $n=9$ ); light grey bars, littermate *Pdx1-Cre* controls (locomotor activity  $n=17$ , feeding behaviour  $n=10$ ). Values are mean±SEM. No significant differences between genotypes were observed for any variable (Student's  $t$  test). **c** No significant differences were detected between genotypes for body composition at 24 weeks of age (% fat) or (**d**) bodyweight at 2 and 7 months of age. Genotypes labelled as above (**b**). Values are means±SEM. **c, d**  $n=10$  and 8 respectively for *Panc-Bmal1<sup>-/-</sup>* mice and littermate *Pdx1-Cre* controls
